# Supplementary material for: Synthesis and molecular docking studies of xanthone attached amino acids as potential antimicrobial and anti-inflammatory agents
Source: Royal Society of Chemistry journal article supplement (doi:10.1039/c7md00209b), 2017-01-01
Supplement: c7md00209b1.pdf [file c7md00209b1.pdf]

## **Synthesis and molecular docking studies of xanthone attached amino acids as potential antimicrobial and anti-inflammatory agents**

**Xing Chen<sup>1</sup>, Jing Leng<sup>1</sup>, K. P. Rakesh<sup>1,2\*</sup>, N. Darshini<sup>2</sup>, T. Shubhavathi<sup>2</sup>, H. K.  
Vivek<sup>3</sup>, N. Mallesha<sup>2\*</sup> and Hua-Li Qin<sup>1\*</sup>**

<sup>1</sup>Department of Pharmaceutical Engineering, School of Chemistry, Chemical Engineering  
and Life Science, Wuhan University of Technology, 205 Luoshi Road, Wuhan,  
430073, PR China

<sup>2</sup>SRI RAM CHEM, R & D Centre, Plot No. 31, JCK Industrial Park, Belagola Industrial  
Area, Mysore 570016, Karnataka, India

<sup>3</sup>Department of Biotechnology, Sri Jayachamarajendra College of Engineering, Mysore-  
570006, Karnataka, India

### **Corresponding authors**

\*Email: rakeshasg@gmail.com

\*Email: research@sriramchem.com

Tel.: +91-821-4255588

\*Email: qinhuali@whut.edu.cn

Fax: +86 27 87749300.

**<sup>1</sup>H, <sup>13</sup>C, Mass and IR spectra of representative compounds**

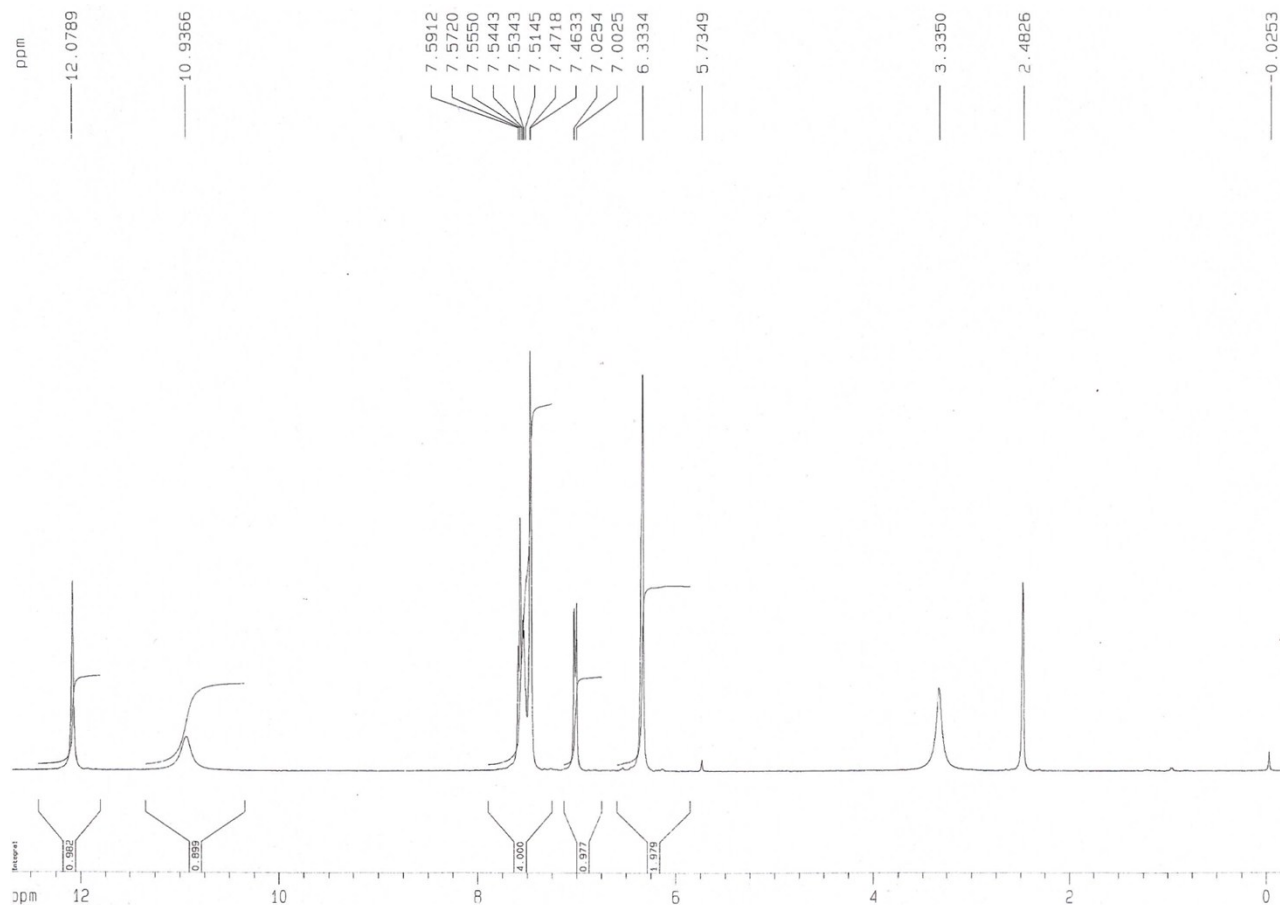

**<sup>1</sup>H-NMR Spectra of compound A**

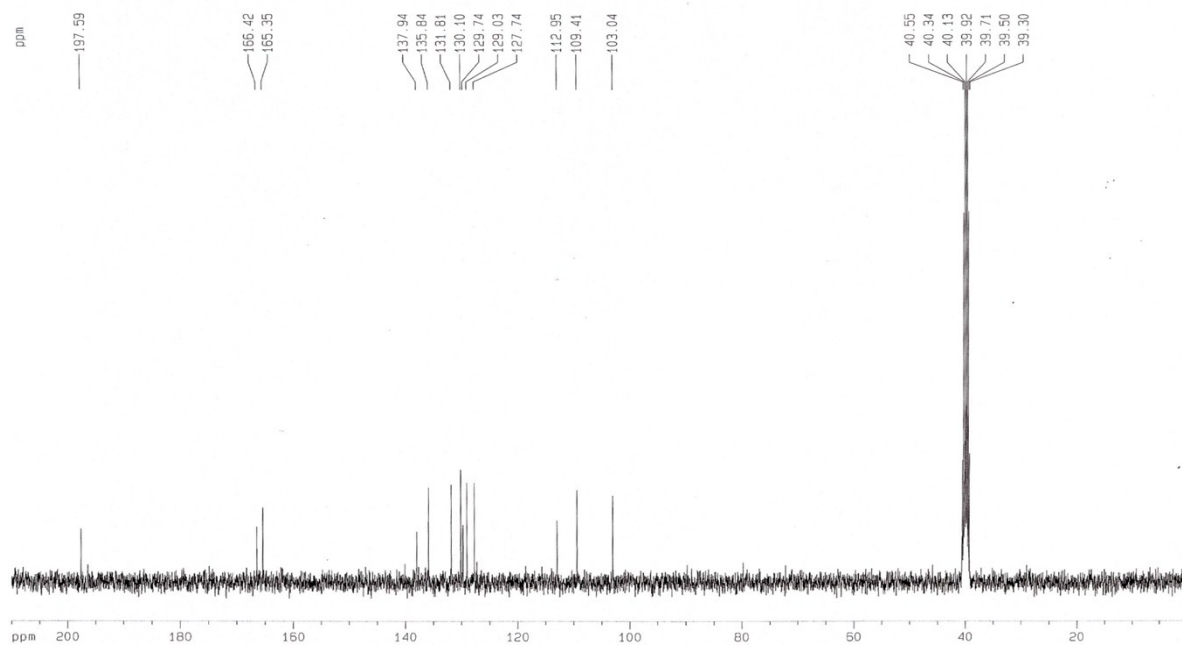

**<sup>13</sup>C-NMR Spectra of compound A**

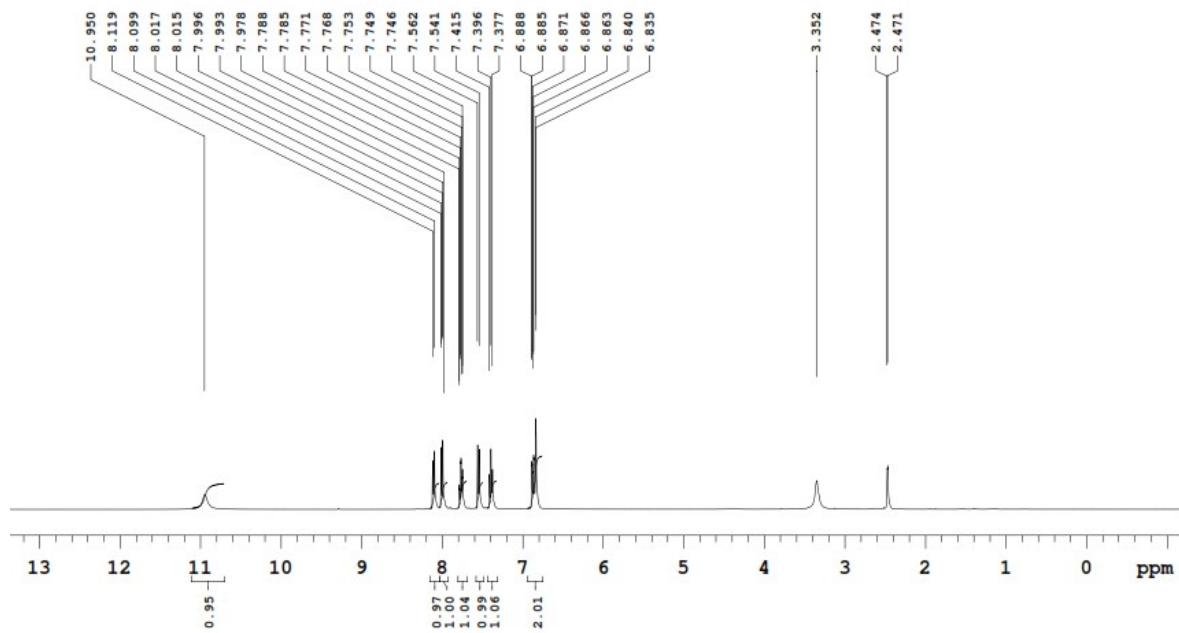

**<sup>1</sup>H-NMR Spectra of compound 1**

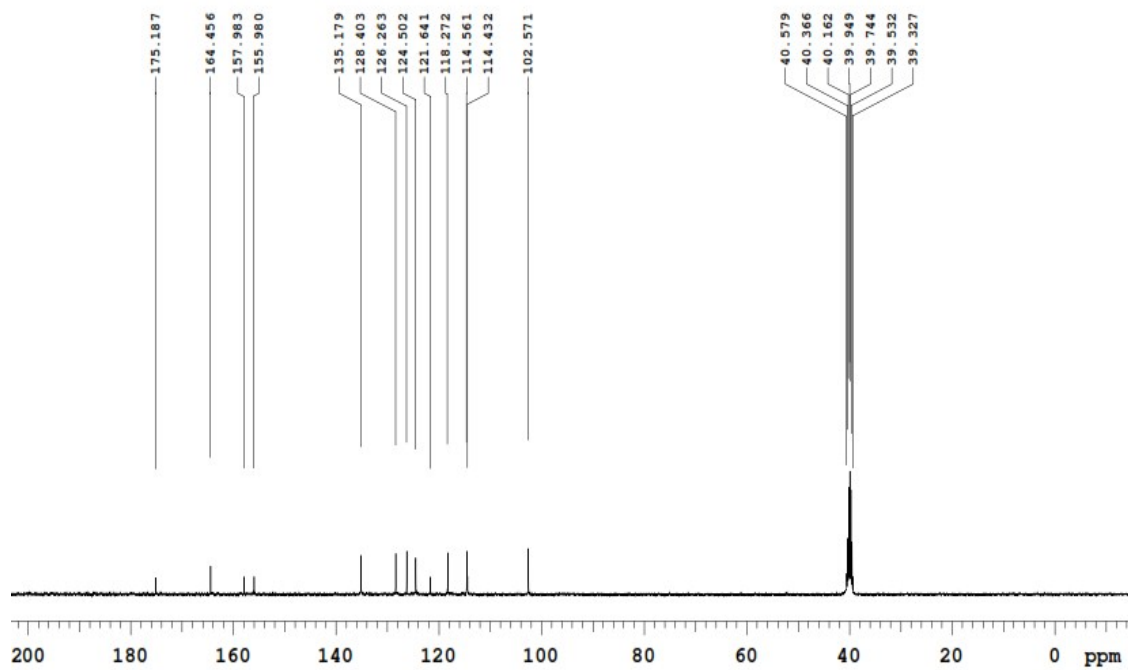

**<sup>13</sup>C-NMR Spectra of compound 1**



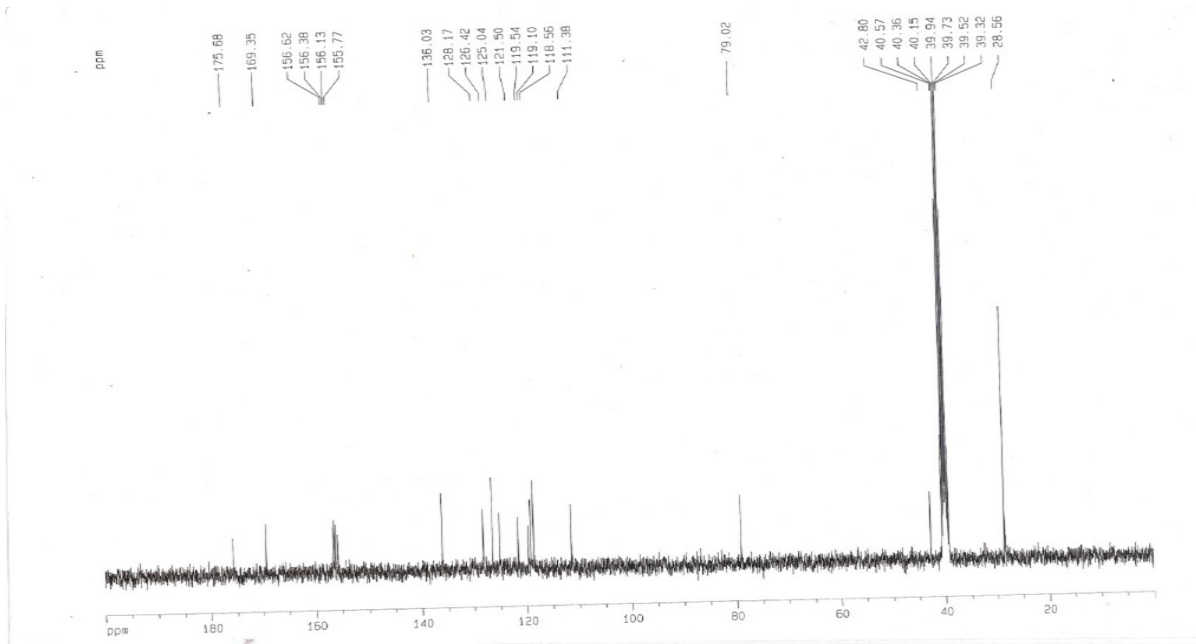

**<sup>13</sup>C-NMR Spectra of compound 2**

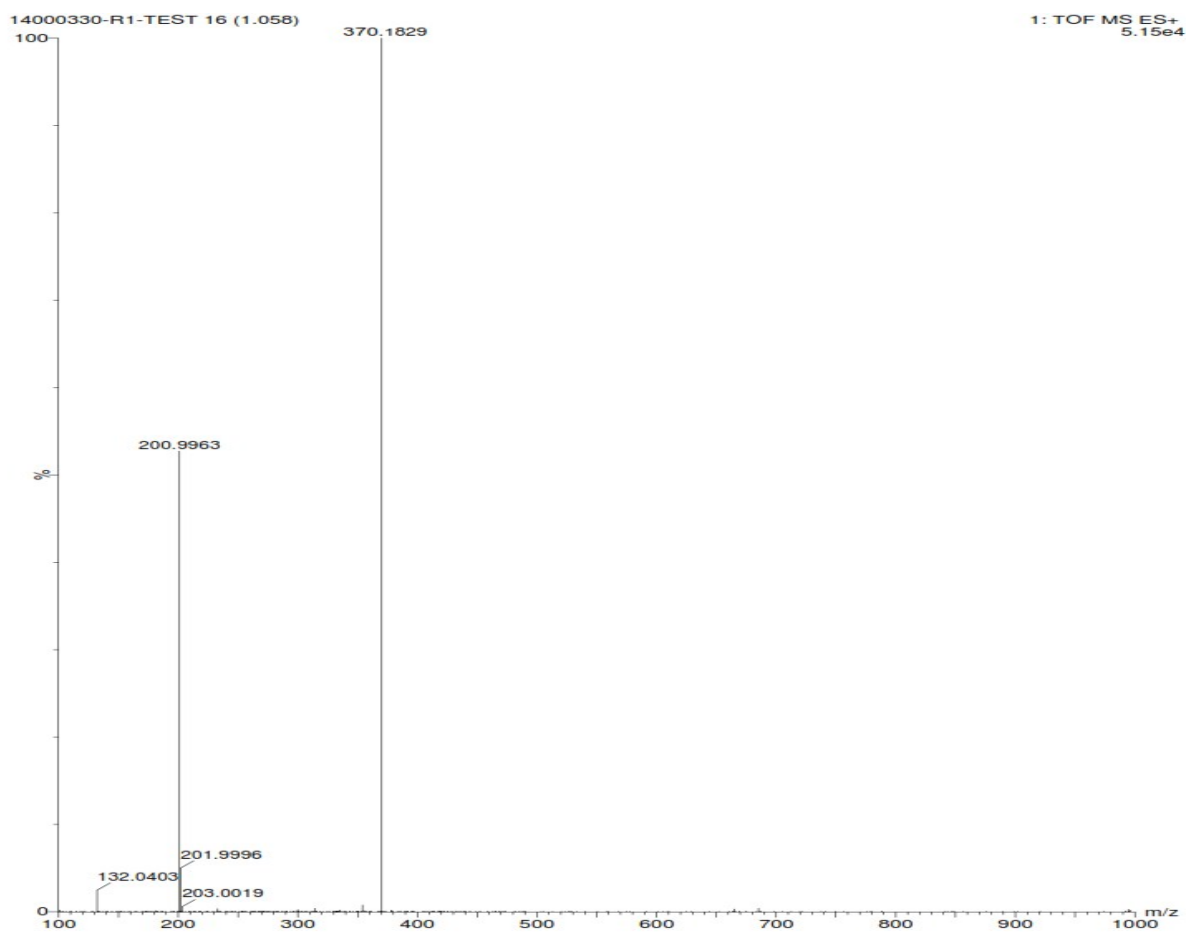

**Mass spectra of compound 2**

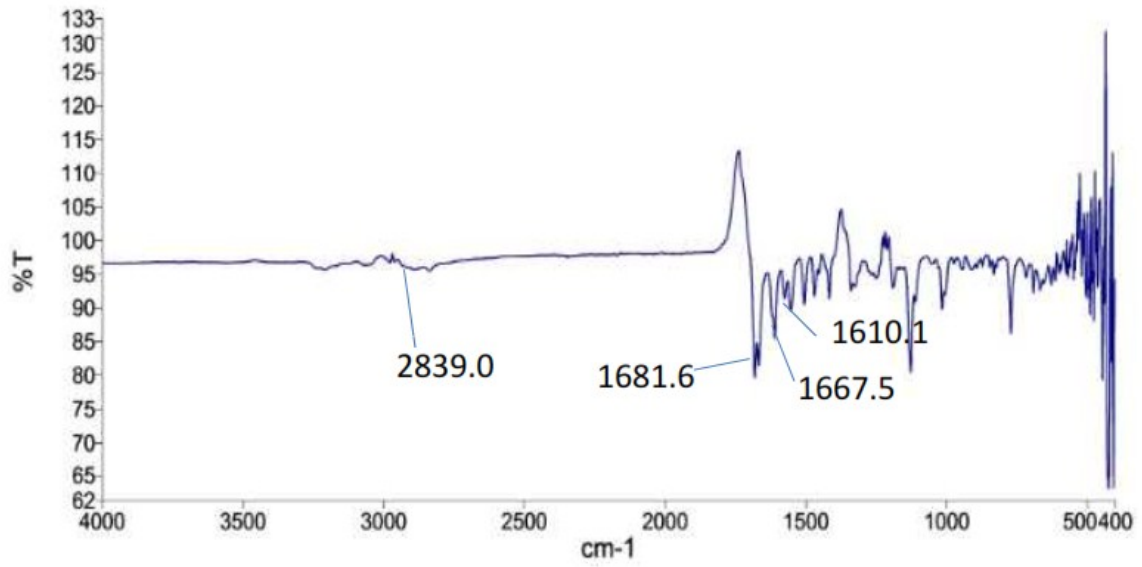

**IR spectra of compound 2**

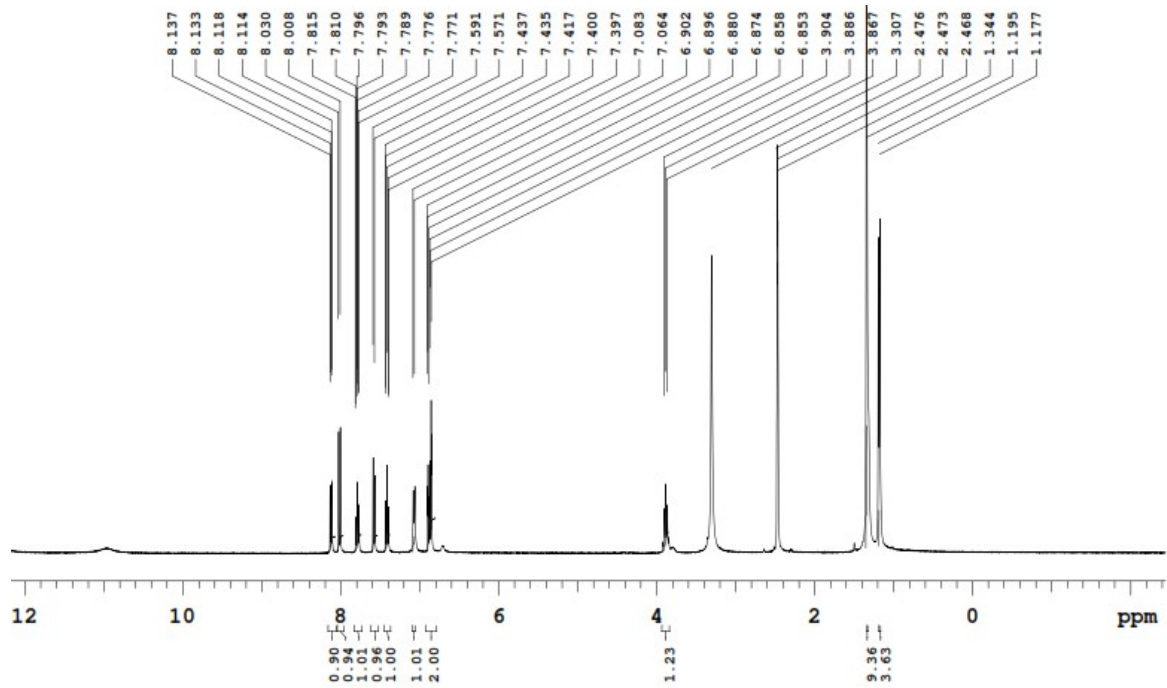

**<sup>1</sup>H-NMR Spectra of compound 3**

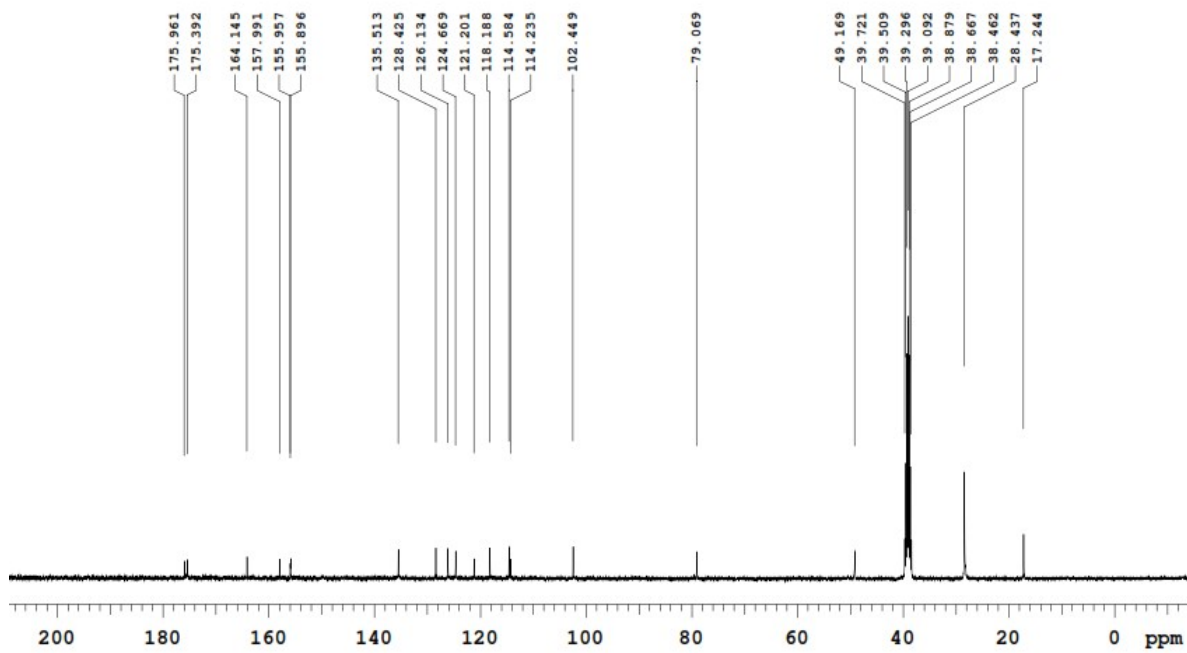

**<sup>13</sup>C-NMR Spectra of compound 3**

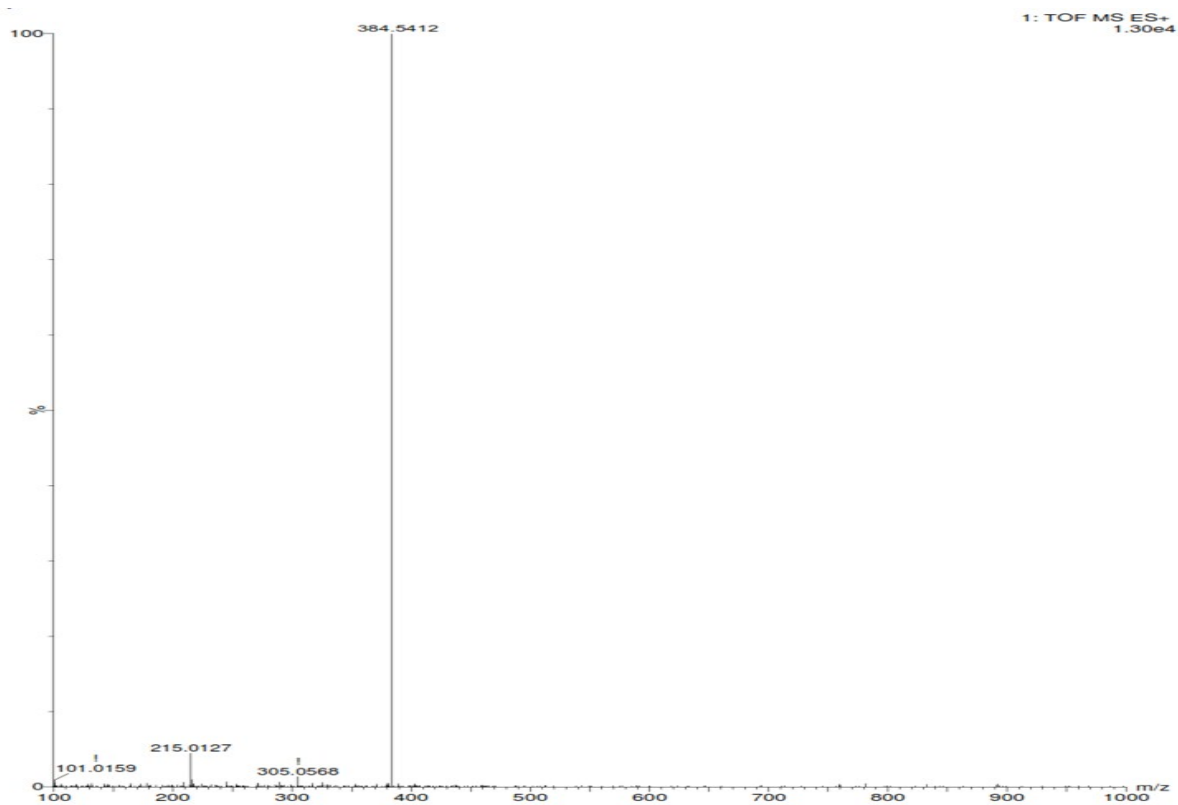

**Mass spectra of compound 3**

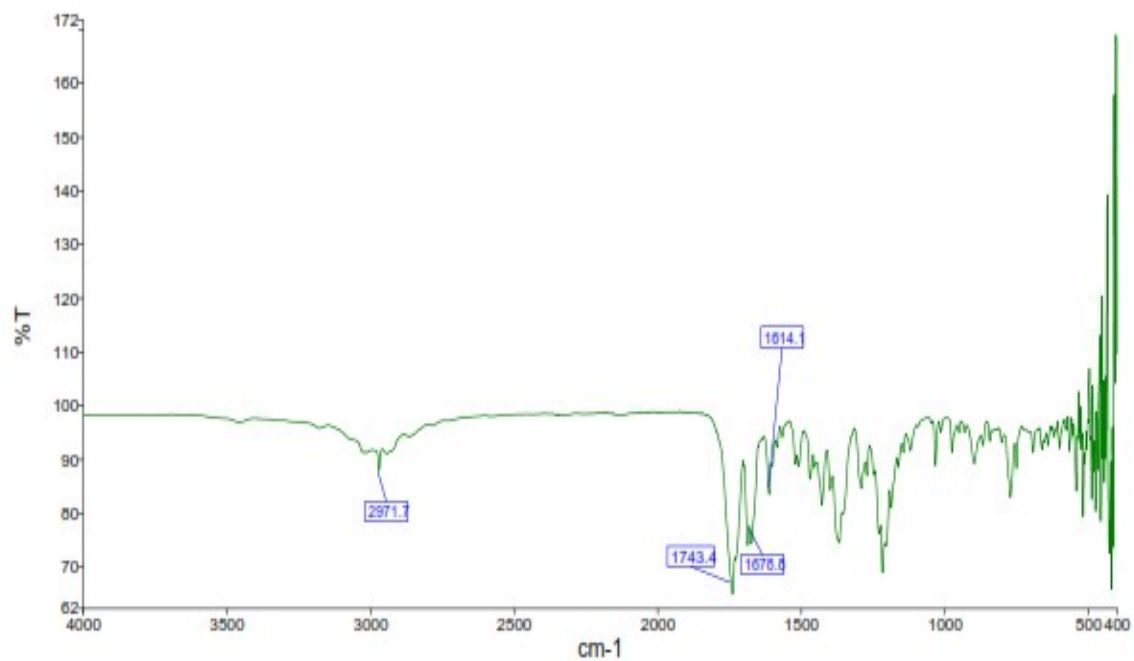

**IR spectra of compound 3**

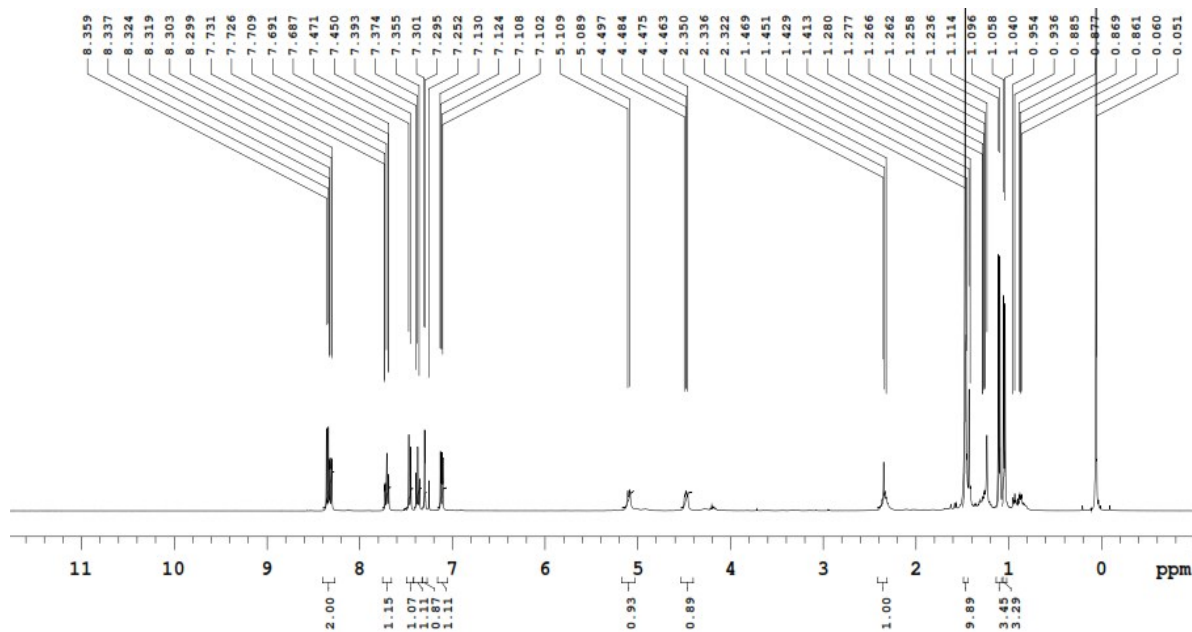

**<sup>1</sup>H-NMR Spectra of compound 4**



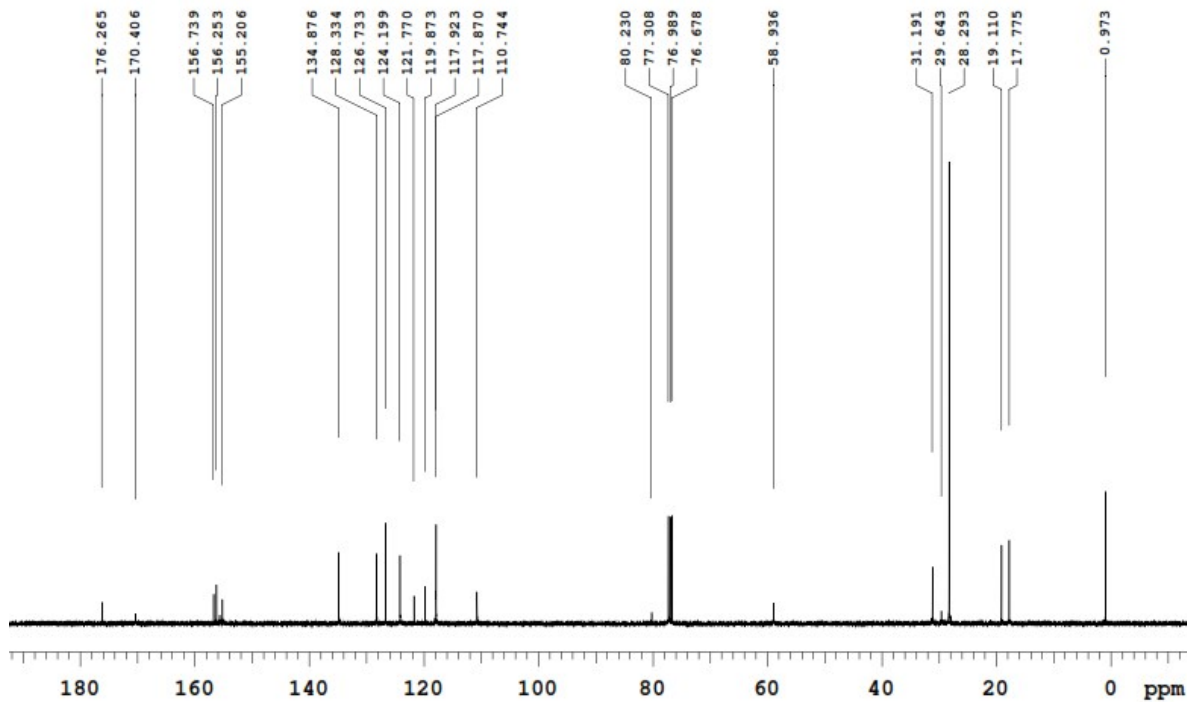

<sup>13</sup>C-NMR Spectra of compound 4

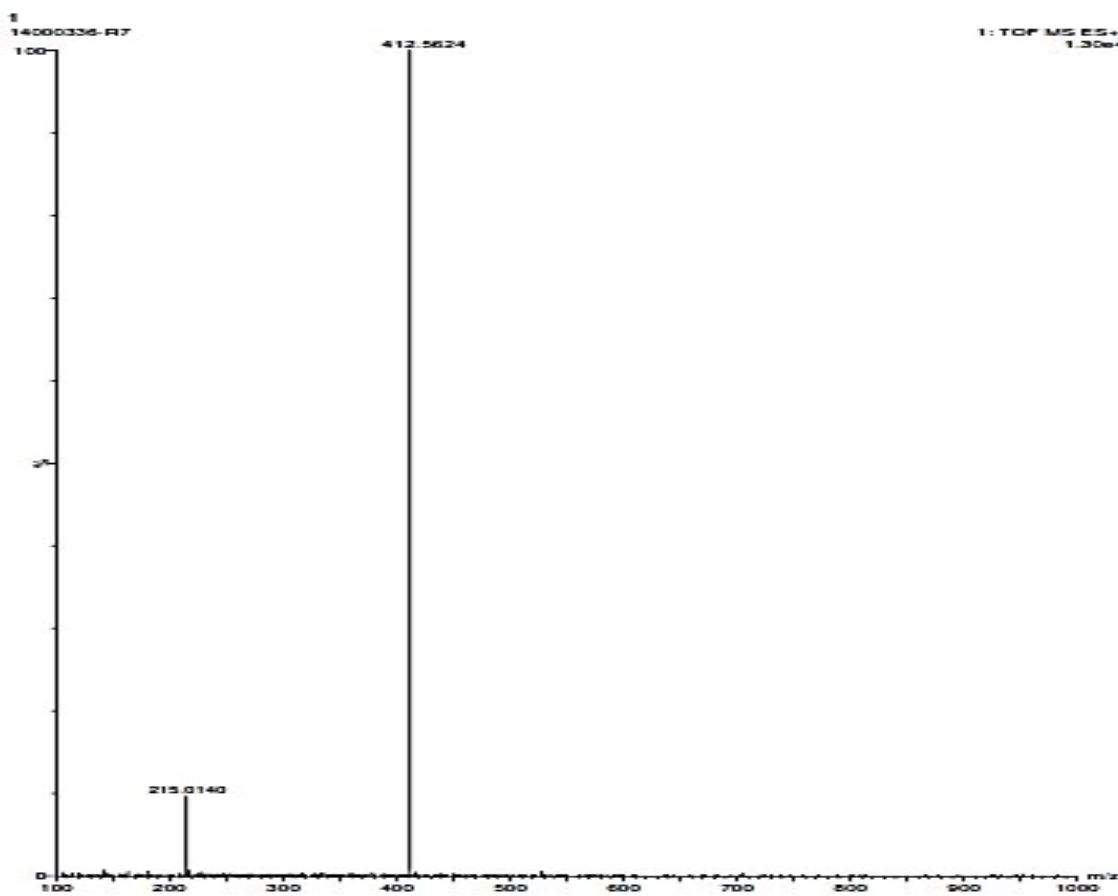

Mass spectra of compound 4



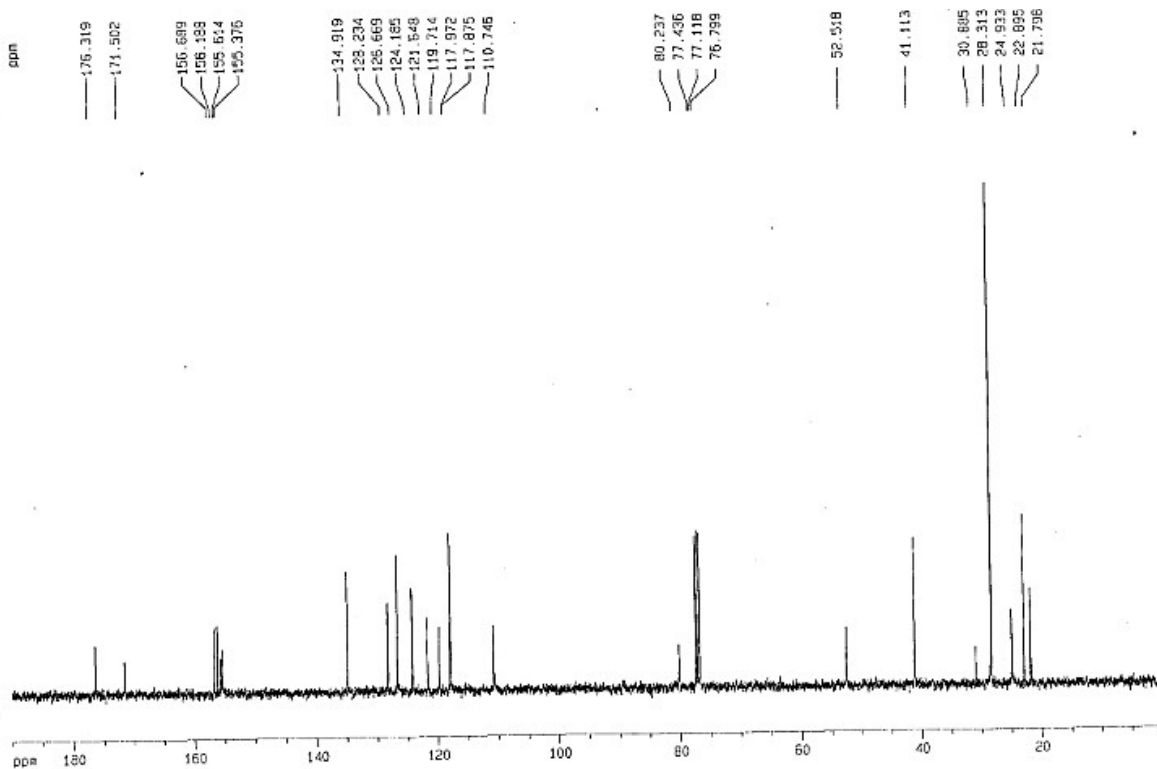

$^{13}\text{C-NMR}$  Spectra of compound 5

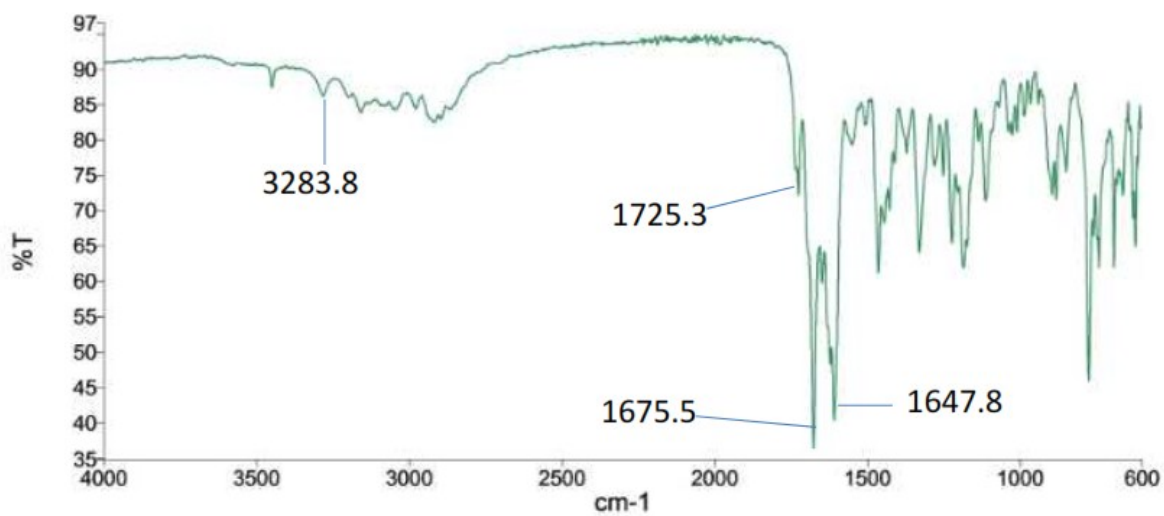

IR Spectra of compound 5

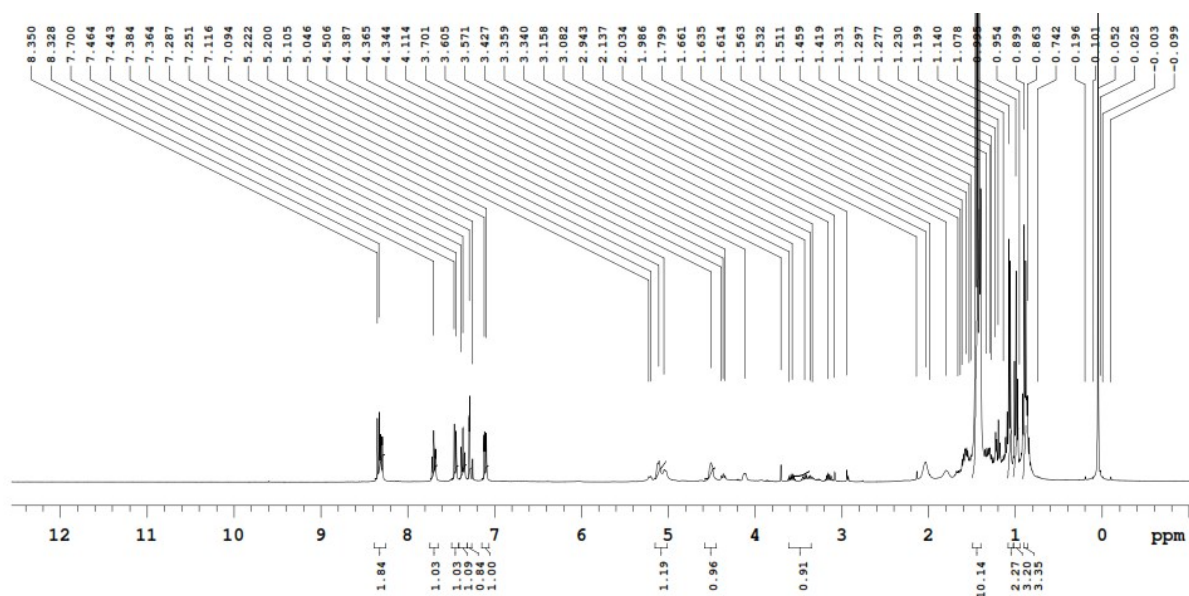

**<sup>1</sup>H-NMR Spectra of compound 6**

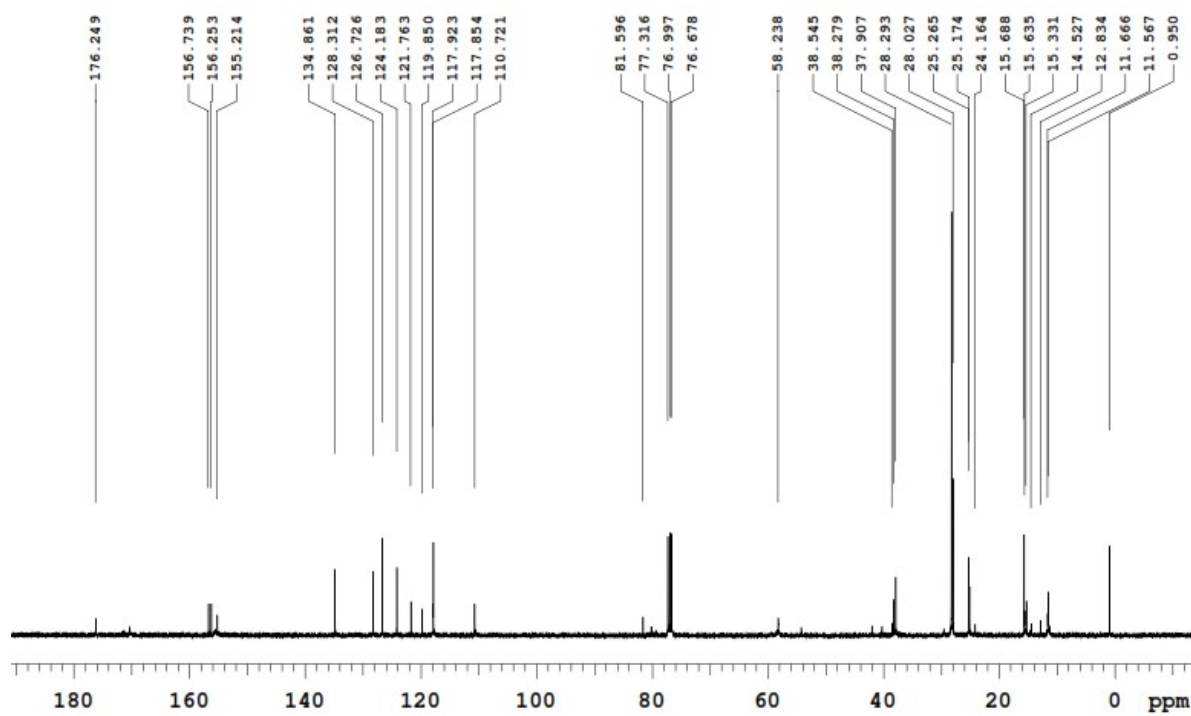

**<sup>13</sup>C-NMR Spectra of compound 6**

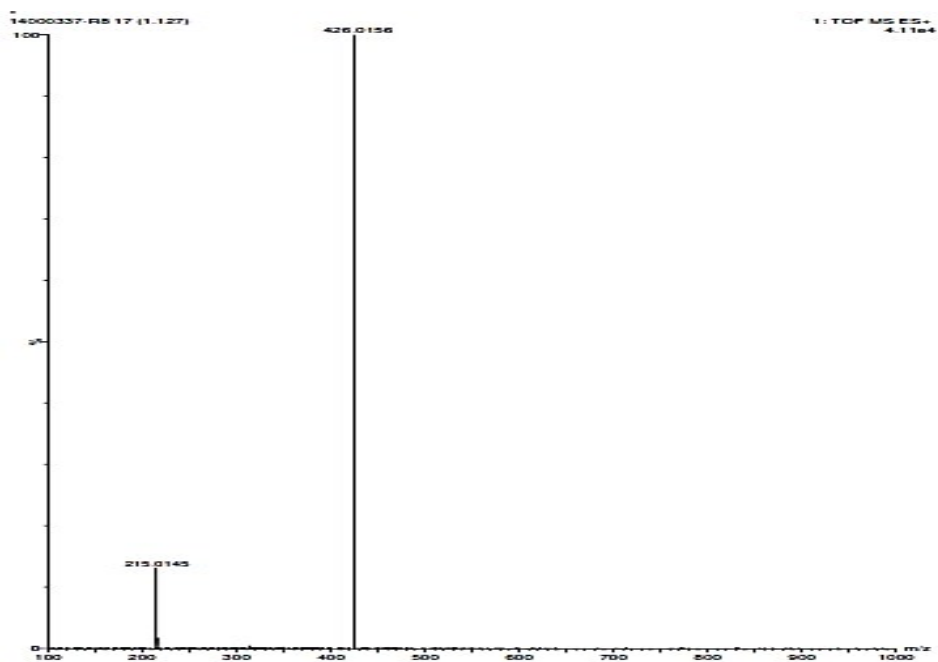

Mass spectra of compound 6

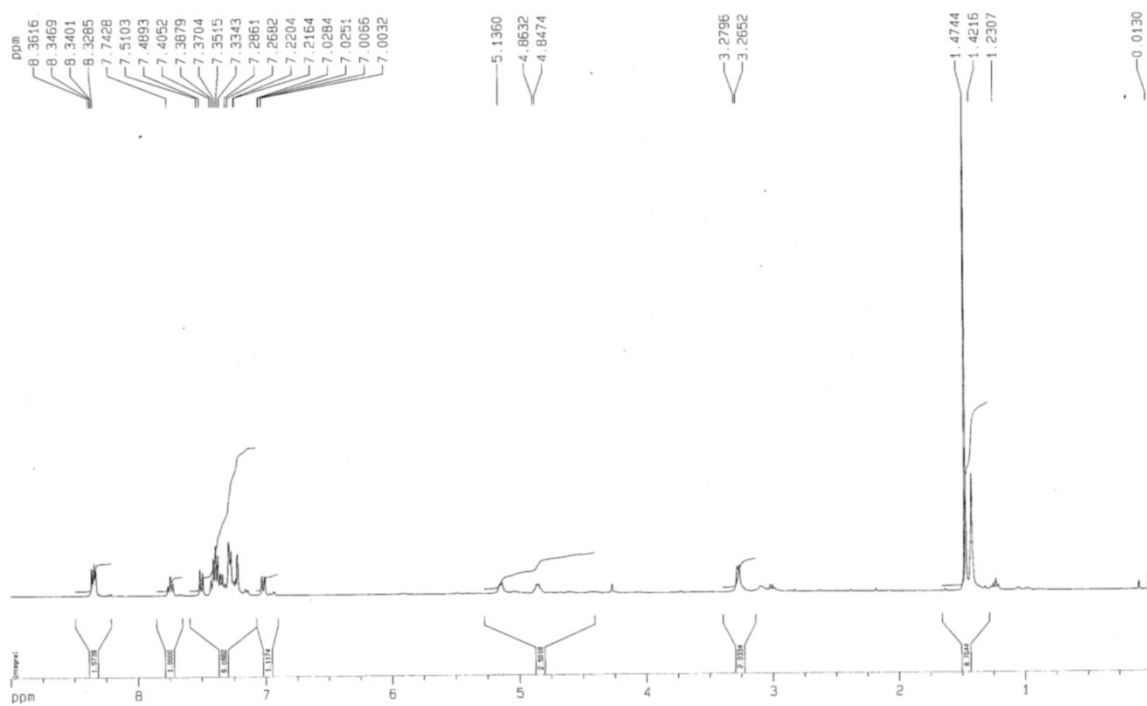

<sup>1</sup>H-NMR Spectra of compound 7

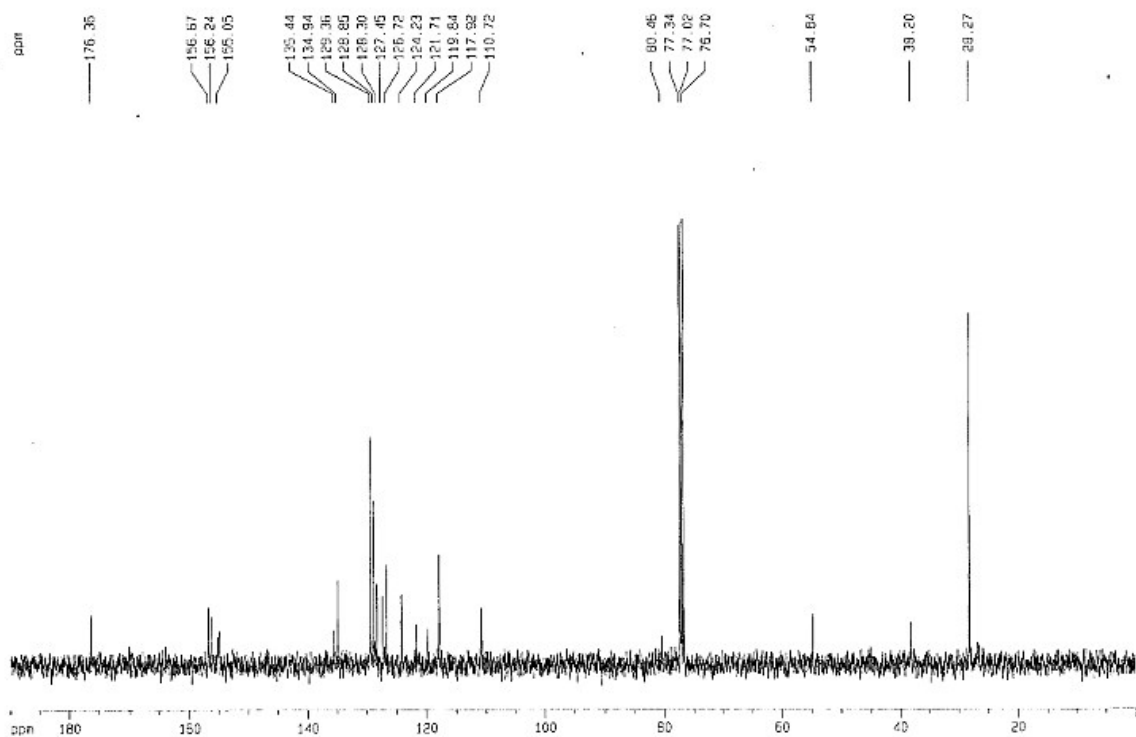

**<sup>13</sup>C-NMR Spectra of compound 7**

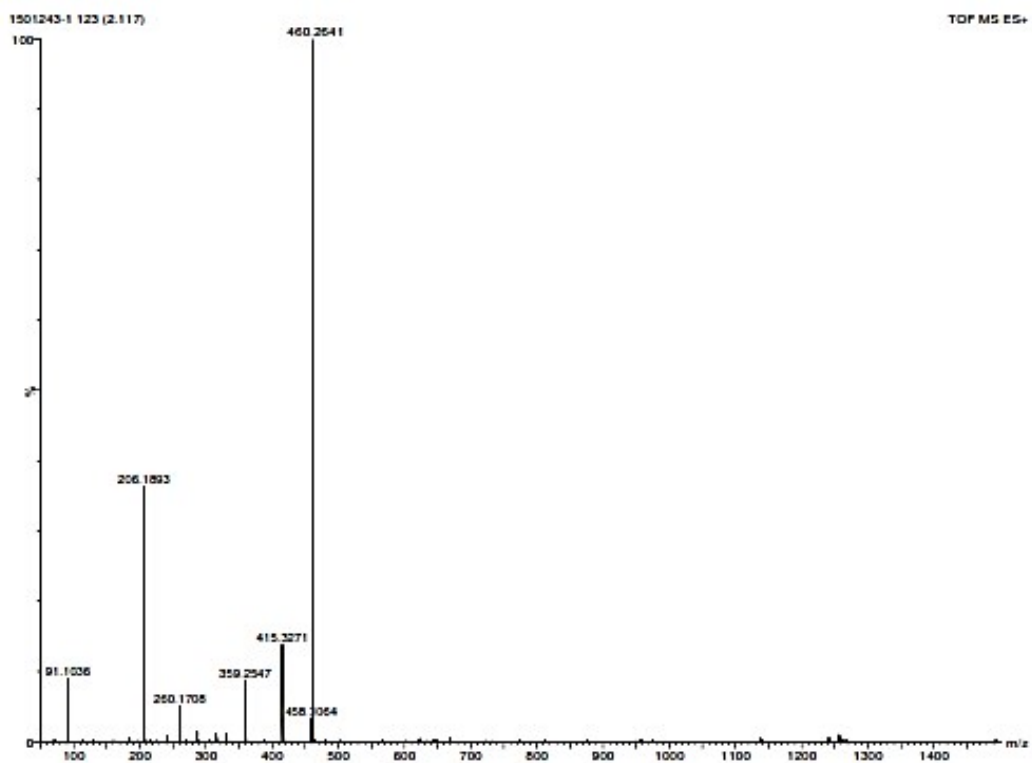

**Mass spectra of compound 7**

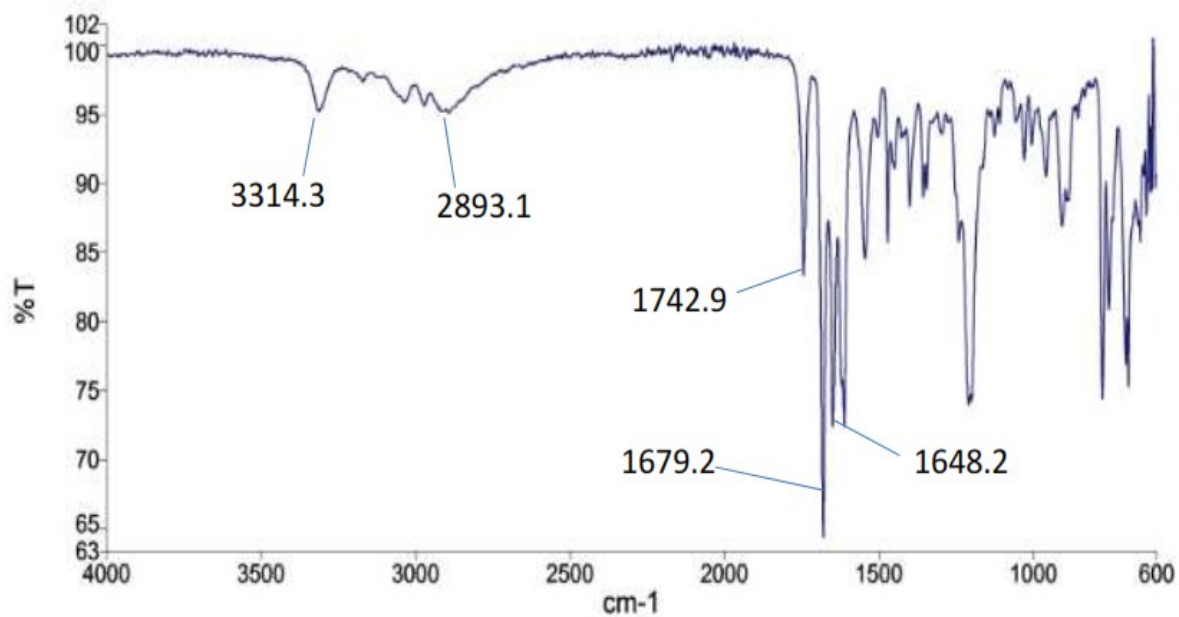

IR spectra of compound 9

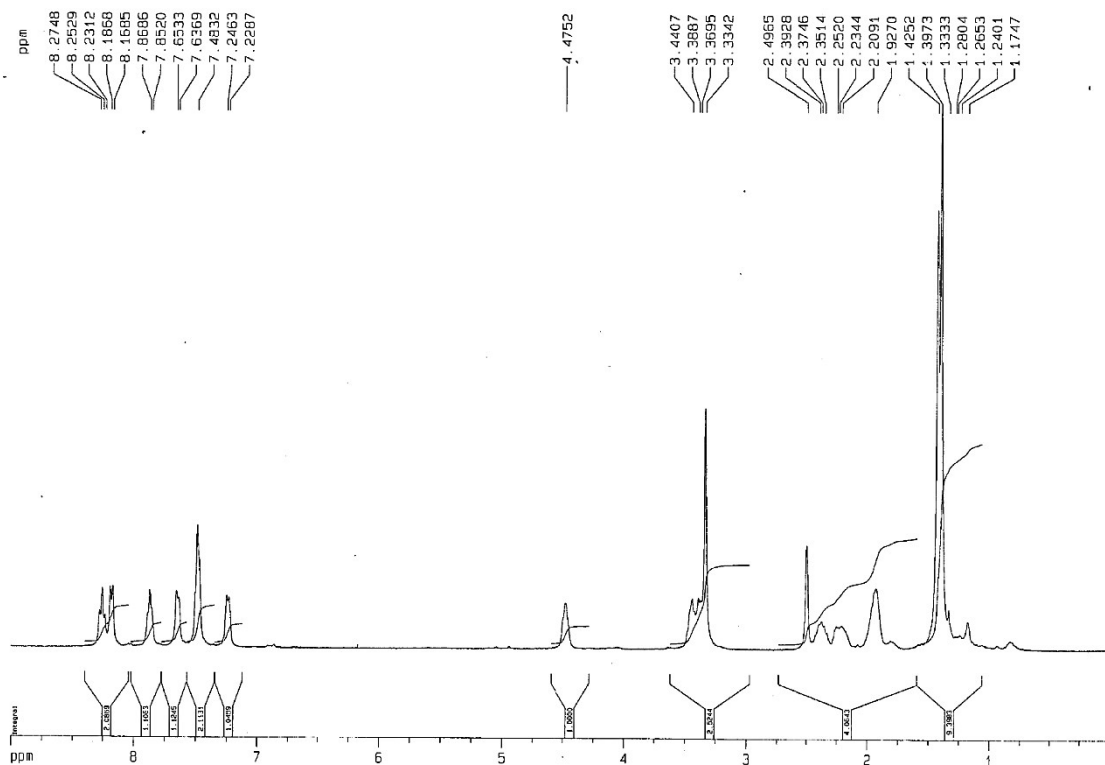

$^1\text{H-NMR}$  Spectra of compound 12

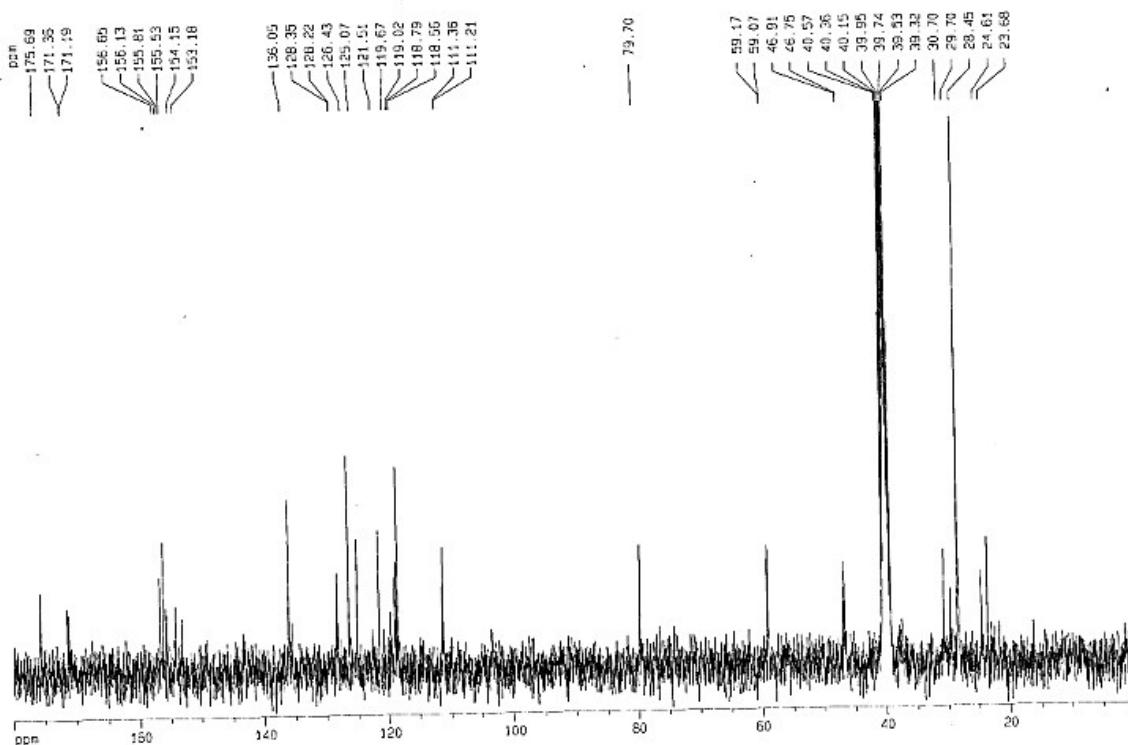

<sup>13</sup>C-NMR Spectra of compound 12

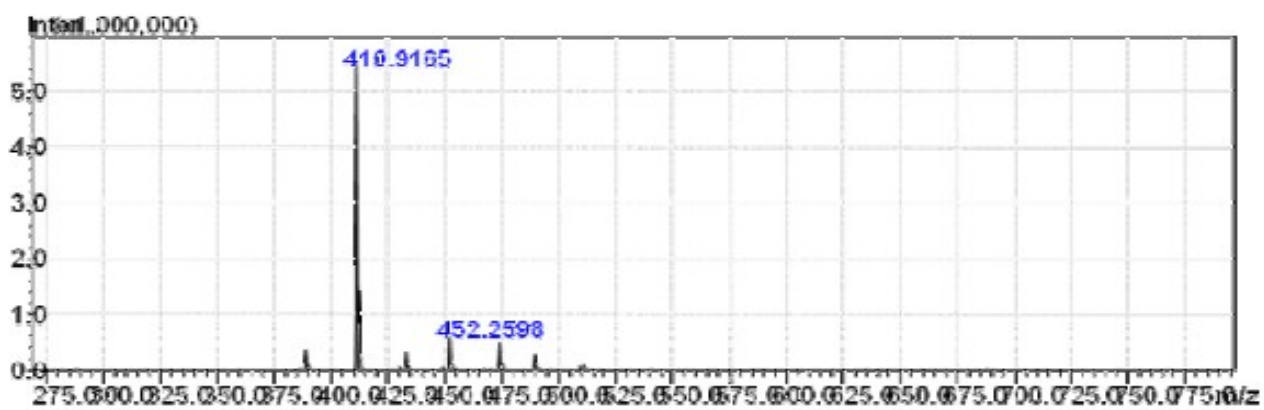

Mass spectra of compound 12



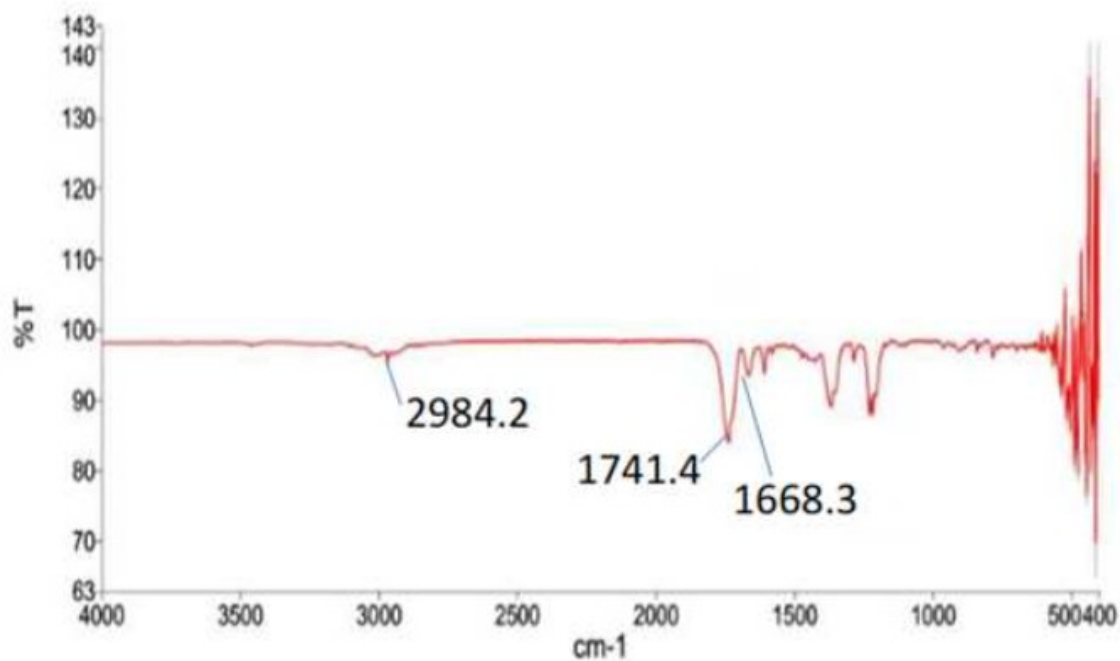

IR spectra of compound no 14

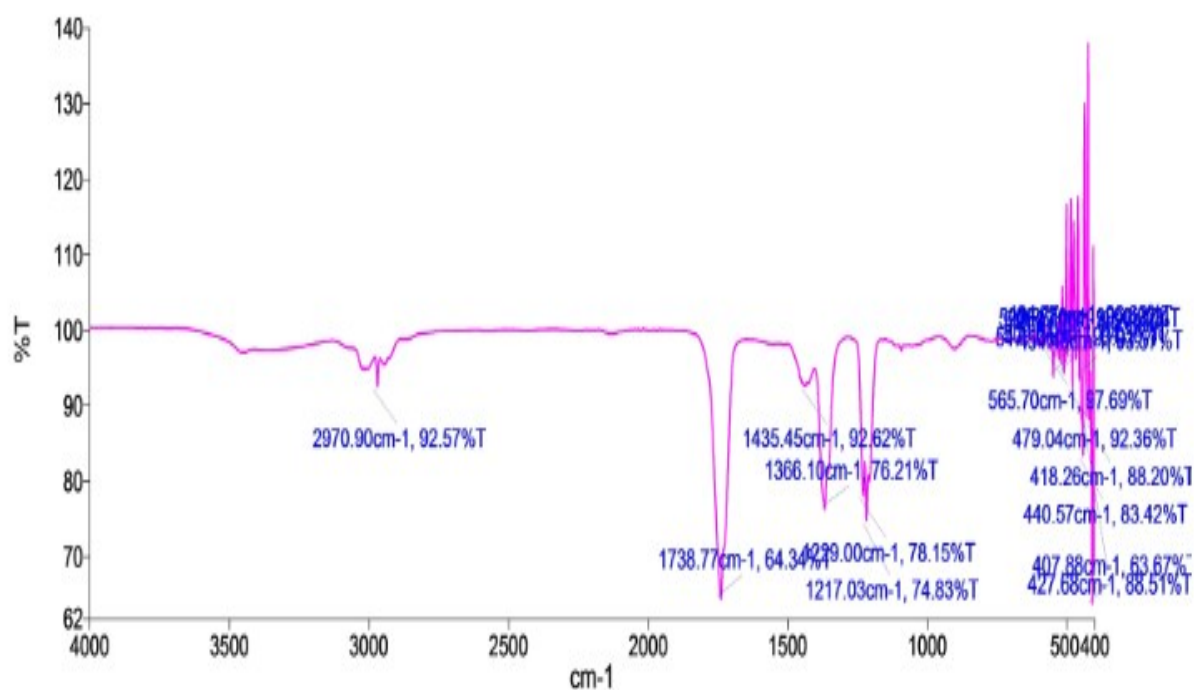

IR spectra of compound no 15

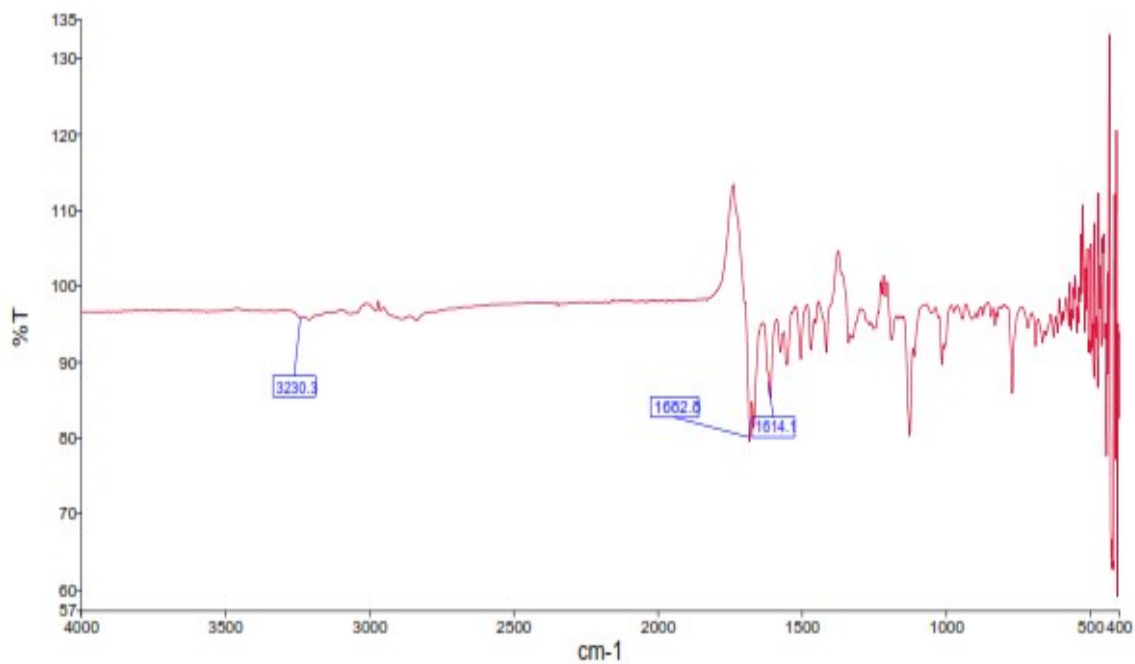

**IR spectra of compound no 16**

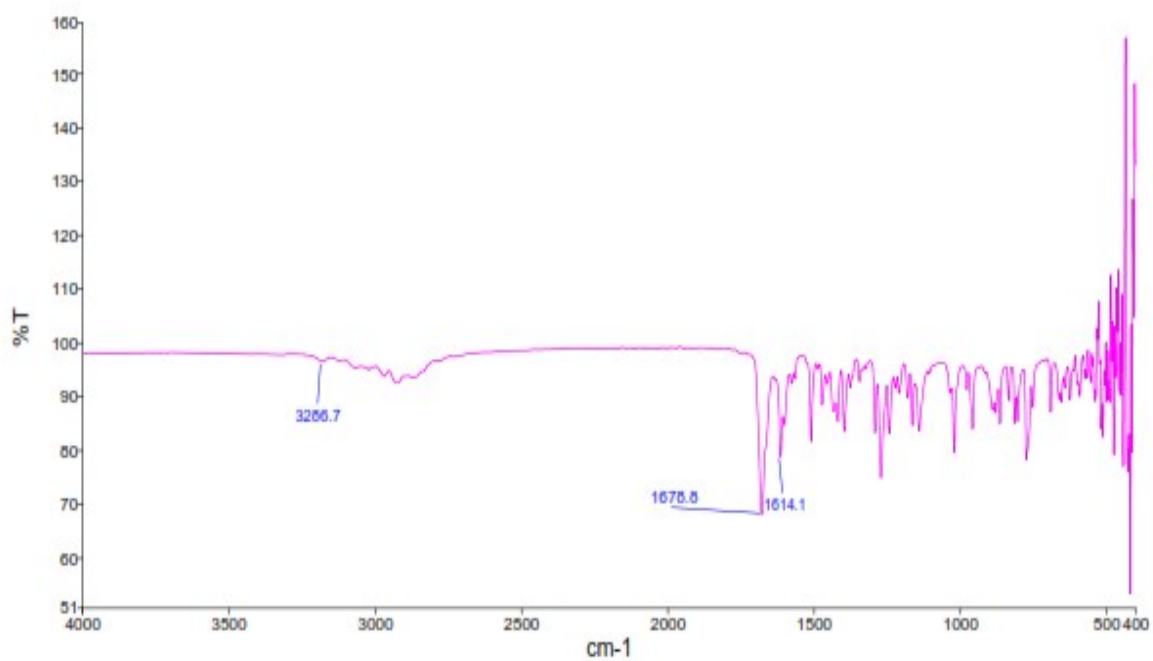

**IR spectra of compound no 17**

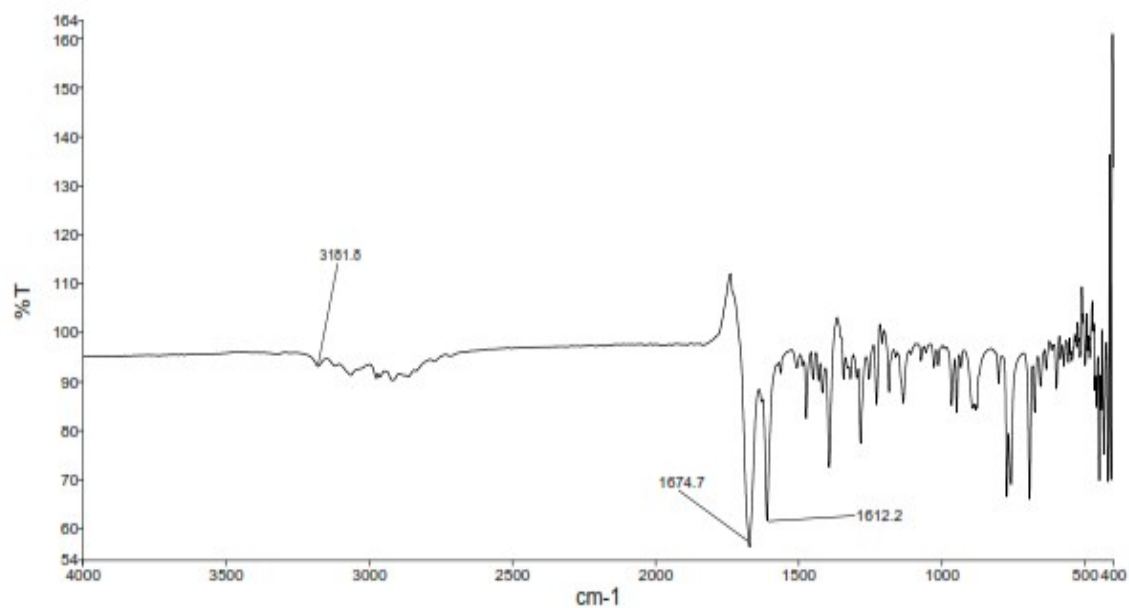

**IR spectra of compound no 18**

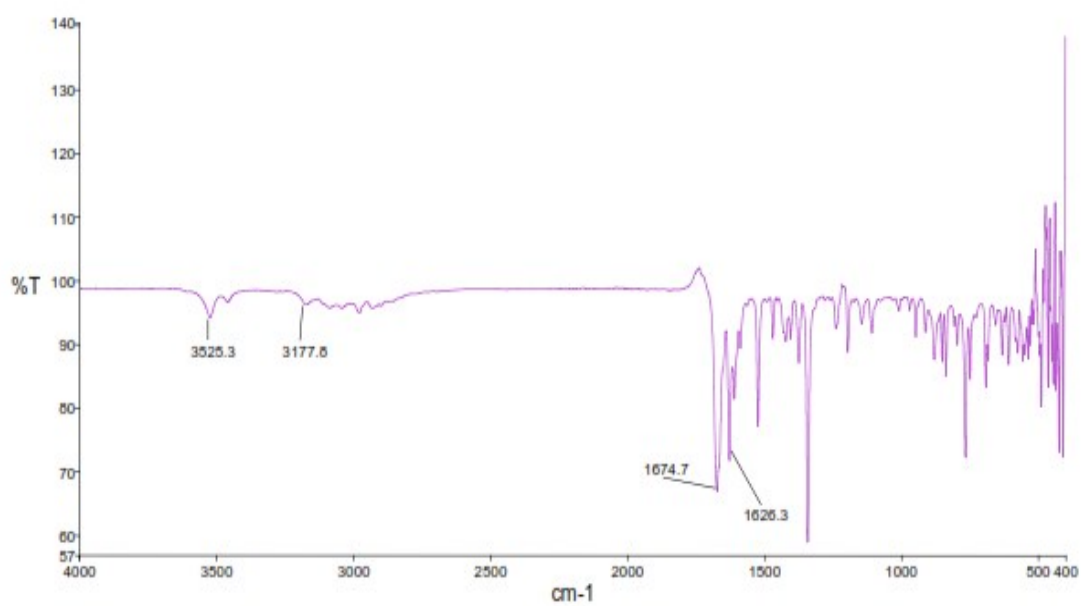

**IR spectra of compound no 19**

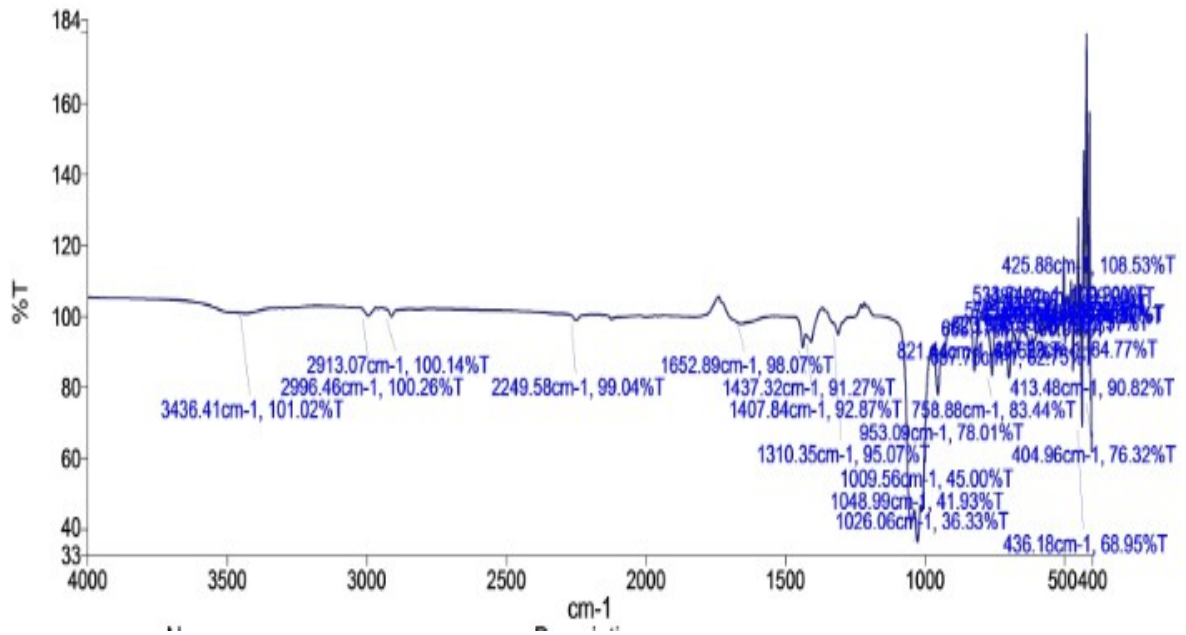

IR spectra of compound no 20

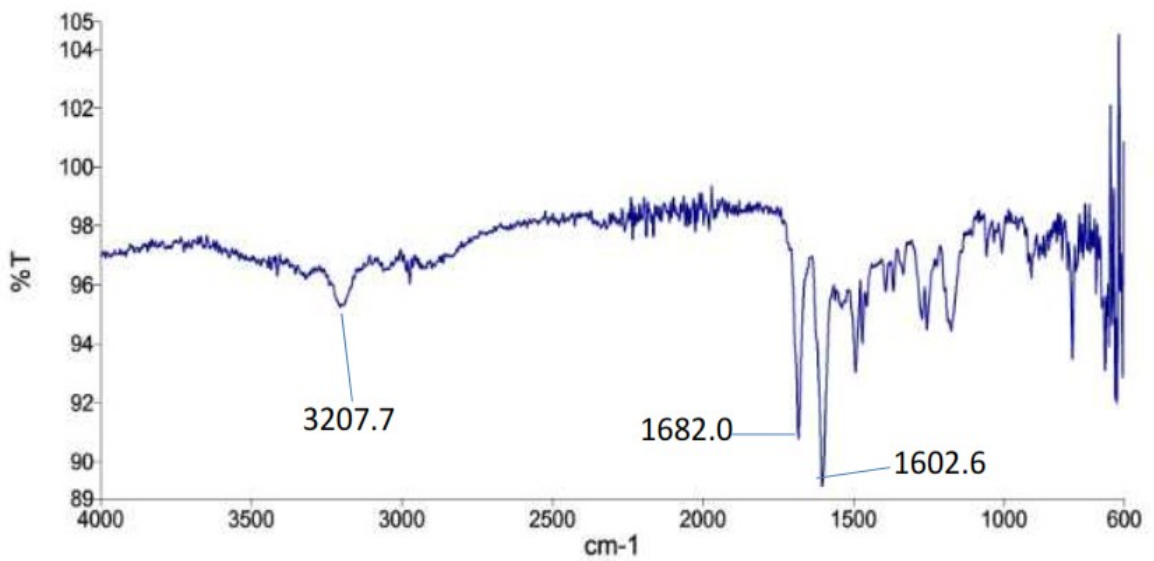

IR spectra of compound no 22
